# Supplementary material
Source: Research Square preprint supplement (doi:10.21203/rs.3.rs-9809513/v1)
Supplement: Supplementary file 1 [file d6ac466782fb72d5d7fea57e.docx]

Supplementary Material

| **Amostra** | **CV** | **Pico amostra** | **Ploidia** |
| --- | --- | --- | --- |
| 1 PA_1 | #### | #### |  |
| 1 PA_2 | 7,44% | 57224,1 | 2x |
| 1 PA_3 | 3,80% | 45156,2 | 2x |
| 1 PA_4 | 3,30% | 60253,2 | 2x |
| 1 PA_5 | 3,67% | 59204,6 | 2x |
| 1 PA_6 | #### | #### |  |
| 1 PA_7 | 3,69% | 56042,4 | 2x |
| 1 PA_8 | 2,83% | 56186,4 | 2x |
| 1 PA_9 | 4,27% | 51151,2 | 2x |
| 1 PA_10 | 3,58% | 53960,8 | 2x |
| 2 PI_1 | 7,30% | 45636,3 | 2x |
| 2 PI_2 | 4,24% | 48695,5 | 2x |
| 2 PI_3 | 4,24% | 53601,8 | 2x |
| 2 PI_4 | #### | #### |  |
| 2 PI_5 | 3,42% | 54488,6 | 2x |
| 2 PI_6 | 6,37% | 60578,8 | 2x |
| 2 PI_7 | 3,64% | 57552,2 | 2x |
| 2 PI_8 | 3,45% | 60430,4 | 2x |
| 3 CAN_1 | #### | #### |  |
| 3 CAN_2 | 3,71% | 60134,1 | 2x |
| 3 CAN_3 | #### | #### |  |
| 3 CAN_4 | 3,58% | 51678,2 | 2x |
| 3 CAN_5 | #### | #### |  |
| 3 CAN_6 | 4,25% | 59861 | 2x |
| 3 CAN_7 | 5,56% | 48619,2 | 2x |
| 3 CAN_8 | 4,96% | 49169,7 | 2x |
| 3 CAN_9 | 4,33% | 49397,1 | 2x |
| 3 CAN_10 | 3,82% | 49915,4 | 2x |
| 4 ANG_1 | 3,76% | 50719,2 | 2x |
| 4 ANG_2 | 4,54% | 55036,1 | 2x |
| 4 ANG_3 | 4,70% | 56477,5 | 2x |
| 4 ANG_4 | 3,78% | 54286,6 | 2x |
| 4 ANG_5 | 4,02% | 57932,5 | 2x |
| 4 ANG_6 | #### | #### |  |
| 5 G53_1 | #### | #### |  |
| 5 G53_2 | 4,71% | 53902,8 | 2x |
| 5 G53_3 | #### | #### |  |
| 5 G53_4 | #### | #### |  |
| 5 G53_5 | #### | #### |  |
| 5 G53_6 | 3,84% | 51342,8 | 2x |
| 5 G53_7 | 3,53% | 55408,1 | 2x |
| 5 G53_8 | 10,17% | 61235,5 | 2x |
| 5 G53_9 | #### | #### |  |
| 5 G53_10 | 7,88% | 56740 | 2x |
| 6 ES_1 | 5,60% | 58392,4 | 2x |
| 6 ES_2 | 5,42% | 52763 | 2x |
| 6 ES_3 | #### | #### |  |
| 6 ES_4 | 3,60% | 54045,6 | 2x |
| 6 ES_5 | #### | #### |  |
| 6 ES_6 | #### | #### |  |
| 6 ES_7 | #### | #### |  |
| 6 ES_8 | 3,51% | 62419,7 | 2x |
| 6 ES_9 | #### | #### |  |
| 6 ES_10 | 5,09% | 52652,7 | 2x |
| 7 RJ_1 | #### | #### |  |
| 7 RJ_2 | 2,44% | 55293 | 2x |
| 7 RJ_3 | #### | #### |  |
| 7 RJ_4 | 4,19% | 54237,9 | 2x |
| 7 RJ_5 | #### | #### |  |
| 7 RJ_6 | 4,68% | 53889,3 | 2x |
| 7 RJ_7 | #### | #### |  |
| 7 RJ_8 | #### | #### |  |
| 7 RJ_9 | 5,09% | 54388,9 | 2x |
| 7 RJ_10 | #### | #### |  |
| 8 LG_1 | #### | #### |  |
| 8 LG_2 | #### | #### |  |
| 8 LG_3 | #### | #### |  |
| 8 LG_4 | 3,86% | 53972,2 | 2x |
| 8 LG_5 | #### | #### |  |
| 8 LG_6 | 2,46% | 56080,1 | 2x |
| 8 LG_7 | #### | #### |  |
| 8 LG_8 | 2,89% | 58696,5 | 2x |
| 8 LG_9 | #### | #### |  |
| 8 LG_10 | 3,56% | 50754,6 | 2x |
| 9 FSA_1 | #### | #### |  |
| 9 FSA_2 | 2,44% | 57551,6 | 2x |
| 9 FSA_3 | 3,47% | 55741,4 | 2x |
| 9 FSA_4 | 2,84% | 55926,5 | 2x |
| 10 SP1_1 | #### | #### |  |
| 10 SP1_2 | 3,13% | 64670,4 | 2x |
| 10 SP1_3 | 5,84% | 50013,6 | 2x |
| 10 SP1_4 | 4,56% | 59610,8 | 2x |
| 10 SP1_5 | 3,84% | 57272,5 | 2x |
| 10 SP1_6 | 11,11% | 56126,8 | 2x |
| 10 SP1_7 | 2,96% | 62820,6 | 2x |
| 10 SP1_8 | #### | #### |  |
| 10 SP1_9 | 4,76% | 49704,3 | 2x |
| 10 SP1_10 | 3,07% | 55037,2 | 2x |
| 11 SP2_1 | 4,67% | 50352,1 | 2x |
| 11 SP2_2 | 4,96% | 50320,1 | 2x |
| 11 SP2_3 | 3,85% | 53681 | 2x |
| 11 SP2_4 | #### | #### |  |
| 11 SP2_5 | 3,93% | 57215,8 | 2x |
| 12 PE_1 | 3,79% | 51132,9 | 2x |
| 12 PE_2 | 4,39% | 52111,8 | 2x |
| 12 PE_3 | 3,10% | 51836 | 2x |
| 12 PE_4 | 2,41% | 56814,2 | 2x |
| 12 PE_5 | #### | #### |  |
| 12 PE_6 | 4,14% | 57324,2 | 2x |
| 12 PE_7 | 5,73% | 50456,6 | 2x |
| 13 IT_1 | 4,05% | 51074,7 | 2x |
| 13 IT_2 | 3,58% | 54205,7 | 2x |
| 13 IT_3 | 4,21% | 51709 | 2x |
| 13 IT_4 | 4,31% | 53989,7 | 2x |
| 13 IT_5 | 5,02% | 52678,6 | 2x |
| 13 IT_6 | 3,73% | 50796,1 | 2x |
| 13 IT_7 | 3,53% | 51175,9 | 2x |
| 13 IT_8 | 3,87% | 52958,6 | 2x |
| 13 IT_9 | 3,98% | 50063,8 | 2x |
| 13 IT_10 | 4,70% | 50925,4 | 2x |
| 14 LJ_1 | #### | #### |  |
| 14 LJ_2 | 5,99% | 53613 | 2x |
| 14 LJ_3 | 4,09% | 52411,2 | 2x |
| 14 LJ_4 | 3,92% | 52522,5 | 2x |
| 15 IX1_1 | 3,93% | 38556,4 | 2x |
| 15 IX1_2 | #### | #### |  |
| 15 IX1_3 | 4,40% | 44156,4 | 2x |
| 15 IX1_4 | #### | #### |  |
| 15 IX1_5 | 4,80% | 40887 | 2x |
| 15 IX1_6 | 3,91% | 40585,7 | 2x |
| 16 IX2_1 | #### | #### |  |
| 16 IX2_2 | #### | #### |  |
| 16 IX2_3 | 7,92% | 46841,4 | 2x |
| 16 IX2_4 | #### | #### |  |
| 16 IX2_5 | #### | #### |  |
| 17 IX3_1 | 4,26% | 40156,2 | 2x |
| 17 IX3_2 | #### | #### |  |
| 17 IX3_3 | #### | #### |  |
| 17 IX3_4 | 2,94% | 45509 | 2x |
| 17 IX3_5 | 2,42% | 45746,8 | 2x |
| 17 IX3_6 | 8,49% | 31696,8 | Mixoploide |
| 17 IX3_7 | 5,28% | 49667,8 | Mixoploide |
| 17 IX3_8 | #### | #### |  |
| 17 IX3_9 | #### | #### |  |
| 18 FE_1 | 3,31% | 94596,7 | 4x |
| 18 FE_2 | 3,35% | 94883,3 | 4x |
| 18 FE_3 | 2,89% | 99194,8 | 4x |
| 18 FE_4 | 3,84% | 102786,1 | 4x |
| 19 CO_1 | 3,06% | 96416,9 | 4x |
| 19 CO_2 | 3,01% | 92073,4 | 4x |
| 19 CO_3 | 3,91% | 103800,9 | 4x |
| 19 CO_4 | 2,28% | 99373,2 | 4x |
| 19 CO_5 | 3,52% | 100675,5 | 4x |
| 20 SC_1 | 3,40% | 95624,9 | 4x |
| 20 SC_2 | 3,42% | 99518,6 | 4x |
| 20 SC_3 | 3,05% | 106301,2 | 4x |
| 20 SC_4 | 3,46% | 96069,5 | 4x |
| 20 SC_5 | 2,34% | 120987,6 | 4x |
| 21 SP_1 | 4,65% | 100857 | 4x |
| 21 SP_2 | 4,01% | 99835,9 | 4x |
| 21 SP_3 | 3,27% | 105871,9 | 4x |
